# Supplementary material for: Study protocol for a randomised controlled double-blinded trial of the dose-dependent efficacy and safety of primaquine for clearance of gametocytes in children with uncomplicated falciparum malaria in Uganda
Source: PubMed Central journal article supplement — BMJ Open. 2013 Mar 26;3(3):e002759. doi: 10.1136/bmjopen-2013-002759 (PMC3612795; doi:10.1136/bmjopen-2013-002759), 2013-03-26
Supplement: bmjopen-2013-002759.draft_revisions.pdf [file bmjopen-2013-002759.draft_revisions.pdf]

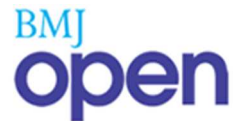

**Study protocol for a randomised controlled double blinded trial of the dose-dependent efficacy and safety of primaquine for clearance of gametocytes in children with uncomplicated falciparum malaria in Uganda**

|                                 |                                                                                                                                                                                                                                                                                                                                                                                                                                                                                                                                                                                                                                                                                                                                                                                                                                                                                                                                           |
|---------------------------------|-------------------------------------------------------------------------------------------------------------------------------------------------------------------------------------------------------------------------------------------------------------------------------------------------------------------------------------------------------------------------------------------------------------------------------------------------------------------------------------------------------------------------------------------------------------------------------------------------------------------------------------------------------------------------------------------------------------------------------------------------------------------------------------------------------------------------------------------------------------------------------------------------------------------------------------------|
| Journal:                        | <i>BMJ Open</i>                                                                                                                                                                                                                                                                                                                                                                                                                                                                                                                                                                                                                                                                                                                                                                                                                                                                                                                           |
| Manuscript ID:                  | bmjopen-2013-002759                                                                                                                                                                                                                                                                                                                                                                                                                                                                                                                                                                                                                                                                                                                                                                                                                                                                                                                       |
| Article Type:                   | Protocol                                                                                                                                                                                                                                                                                                                                                                                                                                                                                                                                                                                                                                                                                                                                                                                                                                                                                                                                  |
| Date Submitted by the Author:   | 19-Feb-2013                                                                                                                                                                                                                                                                                                                                                                                                                                                                                                                                                                                                                                                                                                                                                                                                                                                                                                                               |
| Complete List of Authors:       | Eziefula, Alice; London School of Hygiene and Tropical Medicine, Faculty of Infectious and Tropical Diseases<br>Staedke, Sarah; London School of Hygiene and Tropical Medicine, Faculty of Infectious and Tropical Diseases<br>Yeung, Shunmay; London School of Hygiene and Tropical Medicine, Faculty of Infectious and Tropical Diseases<br>Webb, Emily; London School of Hygiene and Tropical Medicine, Faculty of Infectious and Tropical Diseases<br>Kanya, Moses; Infectious Diseases Research Collaboration,<br>White, Nicholas; Mahidol Oxford Tropical Medicine Research Unit (MORU), Faculty of Tropical Medicine<br>Bousema, Teun; London School of Hygiene and Tropical Medicine, Faculty of Infectious and Tropical Diseases; Radboud University Nijmegen Medical Centre, Department of Medical Microbiology<br>Drakeley, Chris; London School of Hygiene and Tropical Medicine, Faculty of Infectious and Tropical Diseases |
| <b>Primary Subject Heading</b>: | Infectious diseases                                                                                                                                                                                                                                                                                                                                                                                                                                                                                                                                                                                                                                                                                                                                                                                                                                                                                                                       |
| Secondary Subject Heading:      | Epidemiology, Evidence based practice, Global health, Pharmacology and therapeutics, Research methods                                                                                                                                                                                                                                                                                                                                                                                                                                                                                                                                                                                                                                                                                                                                                                                                                                     |
| Keywords:                       | INFECTIOUS DISEASES, Tropical medicine < INFECTIOUS DISEASES, Epidemiology < INFECTIOUS DISEASES, PARASITOLOGY, PUBLIC HEALTH, Clinical trials < THERAPEUTICS                                                                                                                                                                                                                                                                                                                                                                                                                                                                                                                                                                                                                                                                                                                                                                             |
|                                 |                                                                                                                                                                                                                                                                                                                                                                                                                                                                                                                                                                                                                                                                                                                                                                                                                                                                                                                                           |

SCHOLARONE™  
Manuscripts

**TITLE**

Study protocol for a randomised controlled double blinded trial of the dose-dependent efficacy and safety of primaquine for clearance of gametocytes in children with uncomplicated falciparum malaria in Uganda

**Authors:** Alice C. Eziefula<sup>1</sup>, Sarah G. Staedke<sup>1</sup>, Shunmay Yeung<sup>1</sup>, Emily Webb<sup>2</sup>, Moses Kanya<sup>3</sup>, Nicholas J. White<sup>4</sup>, Teun Bousema<sup>1,5</sup>, Chris Drakeley<sup>1</sup>

**\*Corresponding author:** Alice C. Eziefula, Department of Immunology and Infection, London School of Hygiene and Tropical Medicine, Keppel Street, London WC1E 7HT, UK. E-mail: chi.eziefula@gmail.com, Telephone: +44 (0) 207 927 2300, Fax: +44 (0) 207 637 4314

<sup>1</sup>Faculty of Infectious and Tropical Diseases, London School of Hygiene and Tropical Medicine, Keppel Street, London WC1E 7HT, UK

<sup>2</sup>Faculty of Epidemiology and Population Health, London School of Hygiene and Tropical Medicine, Keppel Street, London WC1E 7HT, UK

<sup>3</sup>Infectious Diseases Research Collaboration, Mu-Jhu Building, Mulago Hospital Complex, PO Box 7475, Kampala, Uganda

<sup>4</sup>Mahidol Oxford Tropical Medicine Research Unit (MORU), Faculty of Tropical Medicine, Mahidol University, 420/6 Rajvithi Road, Bangkok 10400, Thailand

<sup>5</sup> Department of Medical Microbiology, Radboud University Nijmegen Medical Centre, 6525 GA Nijmegen, The Netherlands

**Keywords:** Malaria, transmission, gametocyte, primaquine, glucose-6-phosphate dehydrogenase deficiency

1  
2  
3 **Word count** - excluding title page, abstract, references, figures and tables: 3180 words  
4  
5  
6  
7  
8

9  
10 **ABSTRACT**

11  
12 Introduction For the purpose of blocking transmission of Plasmodium falciparum malaria from humans  
13 to mosquitoes, a single dose of primaquine is recommended by the World Health Organisation as an  
14 addition to artemisinin combination therapy. Primaquine clears gametocytes but causes dose-  
15 dependent haemolysis in individuals with glucose-6-phosphate dehydrogenase deficiency. Evidence is  
16 needed to inform the optimal dosing of primaquine for malaria elimination programmes and for the  
17 purpose of interrupting the spread of artemisinin-resistant malaria. This study investigates the efficacy  
18 and safety of reducing doses of primaquine for clearance of gametocytes in participants with normal  
19 G6PD status.  
20  
21  
22  
23  
24  
25  
26  
27  
28  
29

30  
31 Methods and analysis In this prospective, four-armed randomized placebo-controlled double-blinded  
32 trial, children aged 1-10 years, weighing over 10kg , with haemoglobin  $\geq$  8g/dL and uncomplicated  
33 Plasmodium falciparum malaria are treated with artemether lumefantrine and randomised to receive a  
34 dose of primaquine (0.1mg base/ kg, 0.4mg base/ kg or 0.75mg base/kg) or placebo on the third day of  
35 treatment. Participants are followed up for 28 days. Gametocytaemia is measured by quantitative  
36 nucleic acid sequence-based analysis on days 0, 2, 3, 7, 10 and 14 with a primary endpoint of the  
37 number of days to gametocyte clearance in each treatment arm and secondarily the area under the  
38 curve of gametocyte density over time. Analysis is for non-inferiority of efficacy compared to the  
39 reference dose, 0.75 mg base/kg. Safety is assessed by pair-wise comparisons of the arithmetic mean  
40 (+/- standard deviation) change in haemoglobin concentration per treatment arm and analysed for  
41 superiority to placebo and incidence of adverse events.  
42  
43  
44  
45  
46  
47  
48  
49  
50  
51  
52  
53  
54  
55

56 Ethics and dissemination Approval was obtained from the ethical committees of Makerere University  
57  
58  
59  
60

1  
2  
3 School of Medicine, the Ugandan National Council of Science and Technology and the London School of  
4  
5 Hygiene and Tropical Medicine. Results will be disseminated to inform malaria elimination policy,  
6  
7 through peer-reviewed publication and academic presentations.  
8  
9

10  
11 **Trial registration:** NCT01365598  
12

## 13 14 **ARTICLE SUMMARY**

### 15 16 17 **Article focus**

18  
19  
20 Single-dose primaquine, administered together with artemisinin combination therapy, blocks  
21  
22 transmission of *Plasmodium falciparum* malaria by clearing gametocytes.  
23  
24

25  
26 Primaquine, an 8-aminoquinoline, causes dose-dependent haemolysis in individuals with glucose-6-  
27  
28 phosphate dehydrogenase (G6PD) deficiency. Evidence is lacking on the safety and efficacy of lower  
29  
30 doses of primaquine.  
31  
32

33  
34 This is the protocol of a dose-finding trial being conducted in eastern Uganda.  
35  
36  
37  
38

### 39 **Key messages**

40  
41  
42 Dose-finding is a priority for the use of primaquine in malaria elimination programmes and to block the  
43  
44 spread of artemisinin-resistant malaria.  
45  
46

47  
48 This trial is designed to investigate the efficacy and safety of reducing doses of primaquine for  
49  
50 gametocytocidal action.  
51  
52  
53  
54  
55  
56  
57  
58  
59  
60

1  
2  
3 This paper highlights the unique trial design issues that are relevant for investigating the efficacy and  
4  
5 safety of antimalarials targeted against the sexual stages of malaria for blocking transmission rather  
6  
7 than clinical cure.  
8  
9

### 10 11 **Strengths and limitations of this study**

12  
13  
14 For ethical reasons, in this trial, dose-finding is conducted in children with normal G6PD status, but,  
15  
16 ultimately, information is needed on the safety of lower doses in people with G6PD deficiency.  
17  
18

19  
20 This trial measures primaquine's transmission-blocking potential by assessing gametocyte clearance.  
21  
22 Endpoints of mosquito transmission at multiple timepoints could be usefully assessed but on smaller  
23  
24 numbers of individuals.  
25  
26

### 27 **BACKGROUND**

28  
29  
30 Sustained deployment of vector control measures and accessible, effective drug therapy has reduced  
31  
32 the transmission of *Plasmodium falciparum* in many endemic countries. However, further scaling-up of  
33  
34 currently available malaria control measures is unlikely to achieve malaria elimination in most  
35  
36 settings[1]. Moreover, the emergence of resistance to artemisinin in Southeast Asia[2 3], and the  
37  
38 development of insecticide resistance and adaptive behaviour in the mosquito vector[4-6] present  
39  
40 significant threats to the current trend of declining malaria burden. Malaria elimination initiatives and  
41  
42 artemisinin-resistance containment strategies both require additional tools that are specifically aimed at  
43  
44 reducing the transmission of malaria parasites[7 8].  
45  
46  
47  
48  
49  
50  
51  
52

53 Antimalarial drugs are designed primarily to target the asexual stages of the parasite that cause  
54  
55 morbidity and mortality. The effect of antimalarial drugs on gametocytes, the transmission stages, has  
56  
57 for decades been seen as ancillary. *P. falciparum* gametocytes undergo complex development that is  
58  
59  
60

1  
2  
3 characterised by five morphologically distinct stages of maturation[9]. The immature gametocyte stages  
4  
5 (I-IV) are sequestered in the reticuloendothelial system and bone marrow[10-12]. Mature stage V  
6  
7 gametocytes typically appear approximately 12 days after the onset of patent asexual bloodstream  
8  
9 infection, and are the only gametocyte stage that circulates in the peripheral blood and is infective to  
10  
11 biting female *Anopheles* mosquitoes[13 14].The majority of antimalarial drugs, including artemisinins,  
12  
13 lumefantrine and piperaquine, have some efficacy against immature gametocytes[15 16]. These drugs  
14  
15 have the potential to reduce transmission at a population level because asexual parasites are cleared,  
16  
17 preventing *de novo* development of gametocytes, and fewer of the immature gametocytes that are  
18  
19 present upon initiation of treatment survive to maturity. However, the vast majority of symptomatic  
20  
21 cases have measurable and transmissible levels of mature gametocytes at presentation[17 18]. These  
22  
23 persist after treatment with all antimalarials that are currently implemented as first-line treatment,  
24  
25 including artemisinin combination therapy (ACT). Gametocytes that persist after ACT have repeatedly  
26  
27 been shown to be infectious to mosquitoes[17 19 20]. This post-treatment gametocyte carriage  
28  
29 frequently occurs at low densities, commonly below the microscopic threshold for detection[21 22], but  
30  
31 is sufficiently high for efficient mosquito infection[17 23].  
32  
33  
34  
35  
36  
37  
38  
39  
40  
41

42 The only class of drugs that are effective against mature *P. falciparum* gametocytes is the 8-  
43  
44 aminoquinolines. Primaquine is the most widely available drug in this class. The exact mechanism for  
45  
46 this gametocytocidal activity is unknown, but it is probably dependent on oxidative damage to the  
47  
48 intraerythrocytic parasite by primaquine metabolites[24] Primaquine as single dose of 0.75mg base/kg  
49  
50 added to standard artemisinin containing therapy (ACT) has superior gametocytocidal activity to ACT  
51  
52 alone[25-27]. All doses of primaquine described hereafter refer to the dose of primaquine base per unit  
53  
54 weight. There are indications that doses of primaquine lower than 0.75mg /kg may be equally  
55  
56  
57  
58  
59  
60

1  
2  
3 efficacious. A Thai study showed that both 0.5 and 0.25mg /kg of primaquine given with ACT to adults  
4  
5 infected with malaria effectively and indistinguishably reduced the proportion of mosquitoes that  
6  
7 became infected after a blood meal[28]. In small numbers of adults, total doses of 30mg and 15mg have  
8  
9 shown comparable efficacy to a 45mg dose in reducing mosquito infection rates[29 30].  
10  
11

12  
13  
14  
15  
16  
17 The efficacy of primaquine when given as a single low dose is important in the light of concerns over the  
18  
19 haematological safety of primaquine. There is conclusive evidence for primaquine-induced haemolysis  
20  
21 in glucose-6 phosphate dehydrogenase (G6PD) deficient individuals[31 32]. G6PD deficient individuals  
22  
23 are vulnerable to oxidative stress because their erythrocytes do not have alternative pathways for  
24  
25 G6PD-dependent NADPH production, which is essential to maintain anti-oxidant defences. There is  
26  
27 conflicting evidence on the risk of haemolysis after a single dose of primaquine. A single dose of 45mg  
28  
29 primaquine given to a Vanuatan adult caused life-threatening haemolysis[33]. In G6PD deficient  
30  
31 Tanzanian children, the mean fall in haemoglobin after a single dose of 0.75mg/kg primaquine was  
32  
33 2.5g/dL (95% CI, 1.2 to 3.8 g/dl), though no associated severe adverse events were recorded and  
34  
35 haemolysis was transient[34]. On the other hand, primaquine was reported to be well tolerated when  
36  
37 0.75mg/kg was given without prior G6PD testing in large studies in Myanmar, Sudan, Russia, Cambodia  
38  
39 and China[27 31 35 36].  
40  
41  
42  
43  
44  
45  
46  
47

48 Because primaquine induced haemolysis is dose-dependent[29], and because gametocytocidal efficacy  
49  
50 may be retained with primaquine doses lower than 0.75mg/kg, the World Health Organization (WHO)  
51  
52 recommended dose in their 2010 Guidelines for the Treatment of Malaria, dose-finding studies are  
53  
54 needed urgently. This trial tests the hypothesis that lower doses of primaquine have a substantially  
55  
56 lower risk of, or an absence of, adverse effects but that their gametocytocidal efficacy is retained.  
57  
58  
59  
60

## METHODS AND ANALYSIS

### Study design

The study is a prospective, randomised, parallel arm, placebo-controlled, double-blinded clinical trial of reducing doses of primaquine administered with artemether lumefantrine (AL) for the treatment of uncomplicated clinical *P. falciparum* malaria infection in children aged 1-10 years of age. The study uses a non-inferiority design to evaluate the efficacy and a superiority design to evaluate the safety of 0.1mg/kg and 0.4 mg/kg primaquine compared to 0.75mg/kg when added to AL.

### Study objectives

1. To evaluate the efficacy of 0.1mg/kg, 0.4 mg/kg and 0.75 mg/kg primaquine when administered together with the 5<sup>th</sup> dose of AL as measured by gametocyte prevalence and density
2. To evaluate the safety of 0.1mg/kg, 0.4 mg/kg and 0.75 mg/kg primaquine when administered together with the 5<sup>th</sup> dose of AL as measured by change in mean haemoglobin, prevalence of severe anaemia (haemoglobin <5g/dL), and evidence of black urine (haemoglobinuria)
3. To assess the safety of different doses of 0.1mg/kg, 0.4 mg/kg and 0.75 mg/kg primaquine when administered together with the 5<sup>th</sup> dose of AL as measured by prevalence/ incidence of adverse events and tolerability

### Participants and enrolment

The study is conducted at Walukuba Health Centre IV in Walukuba sub-county, Jinja district, in eastern Uganda. In this area, malaria transmission is year-round with two seasonal peaks. The entomological



1  
2  
3 inoculation rate (EIR) was estimated at 7 infectious bites per person per year in Walukuba[37]. Study  
4 participants are recruited from children attending the Health Centre IV with suspected malaria (Figure  
5  
6  
7  
8 1). Inclusion criteria are: age 1-10 years, weight over 10kg, fever (tympanic temperature >38°C) or  
9  
10 history of fever in the last 24 hours, *P. falciparum* mono-infection with a parasite density <500 000/ $\mu$ l,  
11  
12 and normal G6PD enzyme function. Exclusion criteria are: evidence of severe illness/ danger signs,  
13  
14 known allergy to study medications, haemoglobin < 8g/dL , started menstruation, pregnancy or  
15  
16 breastfeeding, antimalarials taken within the last 2 days, primaquine taken within the last 4 weeks,  
17  
18 blood transfusion within the last 90 days.  
19  
20  
21  
22  
23

24 The fluorescent spot test[38] is used for G6PD screening. This test has a cut off of approximately 20%  
25  
26 enzyme function; below that, there is no fluorescence. The WHO classification defines severe G6PD  
27  
28 deficiency as 10% enzyme function[39].  
29  
30  
31  
32

### 33 **Randomization, blinding and intervention**

34  
35  
36 After enrolment (day 0), participants are randomised to a treatment arm stratified by gender (Figure 2).  
37  
38 The study pharmacist selects sequential opaque envelopes (from either the male or the female pile).  
39  
40 Each envelope contains a pre-determined treatment assignment code. The study pharmacist is the only  
41  
42 member of the clinic team not blinded to the treatment arm and is not involved in assessing patients or  
43  
44 assigning outcomes. All study site staff who administer drugs, assess patients and process laboratory  
45  
46 samples do not have access to the randomization code breaker.  
47  
48  
49  
50  
51

52 All participants receive a three day course of artemether lumefantrine according to Ugandan national  
53  
54 treatment guidelines for uncomplicated malaria. Participants are randomised to receive a placebo or a  
55  
56 dose of 0.1mg/kg, 0.4 mg/kg or 0.75g mg/kg primaquine in addition to the AL treatment. The dose of  
57  
58  
59  
60

1  
2  
3 primaquine/ placebo is given at the same time as the fifth dose of AL, in the morning of day 2. To  
4  
5 preserve the accuracy of lower weight-based doses, all primaquine doses are administered in aqueous  
6  
7 solution and measured using a sterile syringe. The placebo is aqueous solution alone. All doses including  
8  
9 placebo are mixed with a glucose syrup that masks the colour and taste of primaquine. All treatments  
10  
11 are directly observed. A snack with approximately 5g of fat is administered prior to both AL and  
12  
13 primaquine administration to optimise absorption of AL and minimise gastrointestinal side effects with  
14  
15 primaquine. Participants are observed for 30 minutes; treatment is re-administered in any case of  
16  
17 vomiting within this period. Repeated vomiting (>3 times) leads to exclusion from the study and  
18  
19 treatment as complicated malaria according to national guidelines.  
20  
21  
22  
23  
24  
25  
26

### 27 Follow up measurements

28  
29  
30 Study participants are reviewed on days 0, 1, 2, 3, 7, 10, 14, 21, 28 after enrolment or on any day of  
31  
32 illness. On each of the scheduled visit days they are assessed clinically with standardised adverse event  
33  
34 recording and blood samples are taken for microscopical detection of asexual parasites and  
35  
36 gametocytes, molecular detection of gametocytes and haemoglobin measurements (Table 1).  
37  
38  
39  
40  
41  
42

43 **Table 1 Summary of outcome measures**

|          | OUTCOME MEASURE                                                                             | DESCRIPTION                                                                                                          |
|----------|---------------------------------------------------------------------------------------------|----------------------------------------------------------------------------------------------------------------------|
| EFFICACY |                                                                                             |                                                                                                                      |
|          | <b>PRIMARY</b> Mean number of days to gametocyte clearance (gametocyte clearance time, GCT) | Mean number of days per treatment arm for gametocytes to become undetectable using sub-microscopic molecular testing |

1  
2  
3  
4  
5  
6  
7  
8  
9  
10  
11  
12  
13  
14  
15  
16  
17  
18  
19  
20  
21  
22  
23  
24  
25  
26  
27  
28  
29  
30  
31  
32  
33  
34  
35  
36  
37  
38  
39  
40  
41  
42  
43  
44  
45  
46  
47  
48  
49  
50  
51  
52  
53  
54  
55  
56  
57  
58  
59  
60

|               |                                                                                                      |                                                                                                                                      |
|---------------|------------------------------------------------------------------------------------------------------|--------------------------------------------------------------------------------------------------------------------------------------|
|               |                                                                                                      | <b>methods (QT-NASBA). Re-appearance of gametocytes after day 14 will be considered re-infection and excluded.</b>                   |
| SECONDARY     | Mean (+/- SD) area under the curve of gametocyte density per day during 14 days of follow-up         | Total number of gametocytes (measured by QT-NASBA) seen over follow up, averaged per day of follow up (days 0-14)                    |
|               | Density of gametocytes on days 7, 10 and 14                                                          | Mean number of gametocytes (measured by QT-NASBA) per treatment arm on days 7, 10 and 14                                             |
|               | Proportion (%) of participants with gametocytes on each day of follow up                             | For each treatment arm, percentage of participants with gametocytes (measured by QT-NASBA) on each day of follow up from days 0-14.  |
| <b>SAFETY</b> |                                                                                                      |                                                                                                                                      |
| PRIMARY       | Mean (+/- SD) maximal fall (+/ or -) in Hb (haemoglobin, g/dL) from enrolment to day 28 of follow-up | Mean maximal greatest negative difference in Hb (measured by HemoCue®) from enrolment value per treatment arm over 28 days follow up |
| SECONDARY     | Follow-up day of Hb nadir                                                                            | Mean day of follow up (day 0-28) per treatment arm of lowest Hb                                                                      |

|  |                                                                                                                  |                                                                                                                                          |
|--|------------------------------------------------------------------------------------------------------------------|------------------------------------------------------------------------------------------------------------------------------------------|
|  |                                                                                                                  | measurement (by Hemocue®)                                                                                                                |
|  | Maximal percentage fall in Hb level compared to enrolment value                                                  | Size of maximal Hb drop (by Hemocue®) during follow up (day 0-28) from enrolment value, divided by enrolment value, *100                 |
|  | % participants with Hb < 5g/Dl during follow up                                                                  | Percentage(number) per treatment arm during days 0-28                                                                                    |
|  | Requirement for blood transfusion                                                                                | Percentage (number) of children receiving blood transfusion per treatment arm during days 0-28                                           |
|  | Evidence of black urine                                                                                          | Percentage (number) of children with documented black/ dark urine with urine dipstick positive for Hb per treatment arm during days 0-28 |
|  | Incidence of serious adverse events by sign, symptom, laboratory parameter and relationship to taking study drug | Percentage (number) per treatment arm during days 0-28                                                                                   |
|  | Incidence of gastrointestinal symptoms after taking study drug                                                   | Percentage (number) per treatment arm during days 2-7                                                                                    |

Blood smears from all visits are Giemsa-stained and 100 microscopic fields are screened for asexual parasites on days 0, 1, 2, 3, 7, 10, 14, 21 and 28. Asexual parasites are counted against 200 white blood cells (WBC) or, if fewer than 10 parasites are observed per 200 WBC, against 500 WBC. Gametocytes are

1  
2  
3 recorded if observed during this screening process. On day 0, 100 microscopic fields are re-read for  
4 gametocytes specifically. If gametocytes are observed, they are quantified against 500 WBC. All  
5  
6  
7  
8 microscopy readings are done by two independent microscopists, if they disagree on prevalence or if  
9  
10 density results differ by more than 25%, a third reading is requested.  
11  
12

13  
14  
15  
16 Gametocytes are quantified on days 0, 2, 3, 7, 10 and 14 using quantitative real time nucleic acid  
17  
18 sequence based analysis (QT NASBA), detecting and quantifying *Pfs25* mRNA. One hundred microlitre of  
19  
20 finger prick blood is mixed with 900µL L6 guanidine buffer (Severn Biotech, UK) and stored at -80°C until  
21  
22 automatic nucleic acid extraction by MagNAPure (Roche) using commercial high yield kits. The *Pfs25* QT-  
23  
24 NASBA is specific for mature gametocytes with a sensitivity of 0.01-0.1 gametocytes/µL of blood when  
25  
26 50µL blood samples are used for RNA extraction[40].  
27  
28  
29  
30  
31  
32  
33

34 Haemoglobin is measured on days 0, 1, 2, 3, 7, 10, 14, 21 and 28 using HemoCue 201+ photometers  
35  
36 (HemoCue; Angelholm, Sweden). At each follow up visit, study staff assess participants in an objective  
37  
38 manner according to a clinical record form and assessment for adverse events is conducted in a  
39  
40 prospective, systematic fashion at all visits, including the enrolment visit (e.g. vomiting post AL). All data  
41  
42 are double-entered in real time.  
43  
44  
45  
46  
47

### 48 **Safety considerations**

49

50  
51 A protocol was developed in order to standardise the detection, investigation and management of  
52  
53 severe haemolysis in this trial (Figures 3 and 4). A Data Safety Monitoring Board (DSMB) has been  
54  
55  
56  
57  
58  
59  
60

1  
2  
3 installed; clinically relevant haemolytic events, hospital admissions, blood transfusions and deaths are  
4  
5 reported within 72 hours to this DSMB.  
6  
7

### 8 9 10 **Ethical considerations**

11  
12  
13 The study protocol and informed consent forms were approved by the Makerere University School of  
14  
15 Medicine Research Ethics Committee (protocol 2011-210), the Uganda National Council of Science and  
16  
17 Technology (protocol HS1056) and the London School of Hygiene and Tropical Medicine research ethics  
18  
19 committee (protocol 5987). The Ugandan National Drug Authority approved the protocol and  
20  
21 importation of primaquine for the purposes of the study. The Data Safety Monitoring Board and Trial  
22  
23 Advisory Committee for the study agreed to meet at predetermined stages of the study. Before the  
24  
25 study began, local community stakeholders (including village health team and local council members) in  
26  
27 Walukuba were consulted and a community advisory board meeting was held.  
28  
29  
30  
31  
32  
33  
34  
35

### 36 **Sample size**

37  
38  
39 For efficacy, the sample size calculation is based on non-inferiority of each of the two test dose arms to  
40  
41 the comparator arm, the WHO-recommended dose of primaquine, 0.75mg/kg. The primary outcome  
42  
43 measure is number of days to gametocyte clearance. The addition of primaquine (0.75mg/kg) to ACT in  
44  
45 Tanzania reduced the time to gametocyte clearance from 28.6 to 6.3 days (standard deviation 6  
46  
47 days)[41]. Allowing for a 10% loss to follow up, a sample size of 120 per arm will provide over 80%  
48  
49 power at the 0.05 significance level to detect non-inferiority to the standard arm with a non-inferiority  
50  
51 margin of 2.5 days, which was considered to be a clinically relevant reduction in gametocyte clearance  
52  
53 time. This sample size also allows for an analysis of superiority of the efficacy of the two test dose arms  
54  
55 to placebo.  
56  
57  
58  
59  
60

1  
2  
3  
4  
5  
6 For safety, the sample size calculation is based on superiority of each of the two test dose arms to the  
7  
8 comparator arm (0.75mg/kg). For this comparator arm, Shekalaghe *et al.*[34] found an overall mean  
9  
10 absolute drop in haemoglobin by day 7 after treatment of 0.6g/dL (standard deviation 1.5). Therefore,  
11  
12 with 80% power and at the 0.05 significance level, a sample size of 99 would be required to detect a  
13  
14 difference in mean maximal drop in haemoglobin between treatment groups of 0.6g/dL.  
15  
16

### 17 18 19 **Data analysis**

20  
21  
22 Data will be double entered in Microsoft Access and imported into Stata version 12.0 (Statacorp Ltd,  
23  
24 Texas, US). All efficacy analyses will be based on gametocyte detection by *Pfs25* QT-NASBA. Gametocyte  
25  
26 density on days 7, 10 and 14 will be compared with the comparator arm (0.75mg primaquine/kg) by chi-  
27  
28 square test. The mean duration of gametocyte carriage and 95% confidence interval will be estimated in  
29  
30 each treatment arm and compared with the comparator arm using a previously validated mathematical  
31  
32 model[42]. The area under the curve (AUC) of gametocyte density over time will be calculated using the  
33  
34 method described by Mendez *et al.*[43]. For individuals who are gametocyte positive at enrolment,  
35  
36 Kaplan-Meier survival analysis will be used to compare the decline in gametocyte prevalence.  
37  
38  
39 The primary safety outcome, mean maximal fall in haemoglobin concentration during 28 days of follow  
40  
41 up will be assessed for each treatment arm. Pair-wise comparisons will be made between each of the  
42  
43 treatment arms and compared with the comparator arm using unpaired t-tests.  
44  
45  
46  
47  
48  
49  
50

### 51 **DISCUSSION**

52  
53  
54  
55 In the 2010 edition of the Guidelines for the Treatment of Malaria, the World Health Organisation  
56  
57 (WHO) recommends that a single dose of 0.75mg/kg primaquine is added to ACT in malaria elimination  
58  
59  
60

1  
2  
3 programmes and for epidemic control, provided the risks of haemolysis in G6PD deficient patients are  
4 considered. This guidance was recently updated to recommend a lower dose of 0.25mg/kg primaquine  
5 without G6PD testing for new malaria elimination programmes and to prevent the spread of artemisinin  
6 resistance[31]. The revision was based largely on grey literature and historical data rather than on  
7 recent clinical trials and few of the data are in the public domain[44]. There have been no formal dose-  
8 finding studies using contemporary tools and standards for the measurement of drug efficacy and safety  
9 for the combination of ACTs and primaquine. In the current study, we aim to provide these urgently  
10 needed efficacy data and provide safety data for individuals with normal G6PD enzyme function.  
11  
12  
13  
14  
15  
16  
17  
18  
19  
20  
21  
22  
23  
24  
25

26 Relatively few trials have been designed specifically to test gametocytocidal drugs *in vivo*. Standardised  
27 protocols and trial designs for assessing the efficacy of drugs targeted against asexual parasites[45  
28 46]are not suitable to assess gametocytocidal drugs, where the main outcome is transmission-blocking  
29 activity rather than clinical or parasitological cure. There is no agreement on the best tools to quantify  
30 gametocyte carriage. Many trials have used microscopy to measure gametocytes[26 27 47-49] while it  
31 has been known for decades that microscopy is notoriously insensitive for detecting gametocytes[50].  
32 Gametocytes typically circulate at densities that are  $\leq 1\%$  of asexual parasite densities[16 51].  
33  
34  
35  
36  
37  
38  
39  
40  
41

42 Nevertheless, gametocytes are often simply recorded while screening for asexual parasites. If slides are  
43 specifically read for gametocytes, the number of microscopic fields that is screened is mostly the same  
44 as that for asexual parasites[52]. As a consequence, gametocytes measured by routine microscopically  
45 underestimate the total gametocyte prevalence by up to 10-fold[16 17 21 22]. In the current study,  
46 gametocytes are quantified with the most widely-used quantitative molecular gametocyte detection  
47 method, QT-NASBA that has an estimated sensitivity of 0.01-0.1 gametocytes/ $\mu\text{L}$  blood in the blood  
48 sample taken[40]. The use of this sensitive molecular method will increase the power of our efficacy  
49  
50  
51  
52  
53  
54  
55  
56  
57  
58  
59  
60



1  
2  
3 estimates since up to 90% of symptomatic malaria patients may harbour (submicroscopic) gametocyte  
4  
5 densities prior to initiation of treatment[16].  
6  
7  
8  
9

10  
11 Gametocyte density is associated with the likelihood of mosquito infection and some of the lowest  
12  
13 gametocyte densities may therefore be unlikely to result in mosquito infections. In general, there are  
14  
15 limitations to which gametocyte prevalence or density can be used to predict mosquito infection rates.  
16  
17 The fitness or infectivity of gametocytes is variable, especially after treatment[19 53 54]. Very early  
18  
19 studies demonstrated that primaquine may render gametocytes non-infectious several days before they  
20  
21 are cleared from the circulation[30 55 56]. The only approach to directly measure transmission blocking  
22  
23 potential involves assessing the infectiousness of the participant's blood to mosquitoes using the  
24  
25 membrane feeding assay or direct skin feeding assays[57], the latter being described by early  
26  
27 malariologists[58 59]. However, the capacity for mosquito feeding assays is not widely available and  
28  
29 repeated assessments of infectiousness on the same patients have never been performed as part of  
30  
31 clinical trials. This is partly because of ethical concerns related to repeated venous bleeding in young  
32  
33 children, and partly because of the complexity of mosquito husbandry when large numbers of  
34  
35 mosquitoes are required for robust transmission estimates[60]. In the absence of biomarkers, using the  
36  
37 prevalence and density of gametocytes after treatment is the most pragmatic approach to assess the  
38  
39 transmission blocking efficacy of drugs across a variety of malaria endemic settings.  
40  
41  
42  
43  
44  
45  
46  
47  
48  
49  
50

51 To assess the safety of the 8-aminoquinoline drugs, there must be a clear definition of the risk of  
52  
53 haemolysis and how it should be measured[31 61]. The safety profile may best be defined by the  
54  
55 incidence of endpoints that could compromise health, such as signs of severe haemolysis, and the need  
56  
57  
58  
59  
60

1  
2  
3 for interventions such as haematinic drug administration, hospitalization or blood transfusion. These  
4  
5 events, however, are rare and changes in haemoglobin concentration may be a more sensitive primary  
6  
7 safety outcome for standard clinical trials. In a recent Cochrane review of randomised controlled trials of  
8  
9 primaquine's efficacy, only one trial[25] was found to have measured haemoglobin concentration to  
10  
11 assess safety[62]. In this current study, clinically-relevant safety endpoints have been selected and a  
12  
13 standardized procedure is in place for the investigation and management of severe haemolysis. A  
14  
15 shortcoming of the current study is that safety data are most urgently needed in the most vulnerable  
16  
17 group, G6PD deficient individuals. For ethical reasons this group was excluded. The authors consider  
18  
19 that the priority is first to determine the minimal effective dose in a G6PD normal population before  
20  
21 G6PD deficient individuals are exposed to this low dose of primaquine to assess safety.  
22  
23  
24  
25  
26  
27  
28  
29  
30

31 The ultimate evidence for a beneficial role of primaquine in reducing malaria transmission would come  
32  
33 from trials assessing the effect of the drug on measures of community-level transmission. Once a safe  
34  
35 and efficacious dose of primaquine in combination with ACTs is established, a next step is designing  
36  
37 these community trials. Treatment of symptomatic cases could play an important role in reducing the  
38  
39 spread of (resistant) malaria strains from symptomatic patients[63]. However, because of the large pool  
40  
41 of asymptomatic parasite carriers in all endemic settings[64] and their importance in defining  
42  
43 transmission potential, any effect of primaquine on community-wide transmission will be limited if  
44  
45 administration is restricted to symptomatic cases. Other strategies such as pro-active screening and  
46  
47 treatment and (focal) mass drug administration may have a larger impact in some settings[65]. This trial  
48  
49 forms the starting point for defining the optimal dose of primaquine for use in transmission-blocking  
50  
51 interventions.  
52  
53  
54  
55  
56  
57  
58  
59  
60

### Trial Status

Recruitment began on 6<sup>th</sup> December 2011. The trial is ongoing.

### List of abbreviations

ACT artemisinin combination therapy

AL artemether lumefantrine

G6PD glucose-6-phosphate dehydrogenase

Hb haemoglobin

QT-NASBA quantitative real time nucleic acid sequence-based

WHO World Health Organization

### Authors' contributions

Conceived and designed the study: ACE, SGS, SY, NJW, TB, CD. Participated in logistical planning: ACE, SGS, SY, EW, MK, NJW, TB, CD. Provided statistical support for the sample size estimates and the design of the statistical analysis: EW. Provided expertise for sub-microscopic gametocyte measurement: TB. Organised ethical applications, community sensitisation and study implementation: ACE. Wrote the manuscript: ACE, TB, CD. All authors read and approved the final manuscript.

### Acknowledgements

1  
2  
3 The authors would like to thank staff at the Infectious Diseases Research Collaboration (IDRC) in Uganda,  
4 notably, Mr Moses Kiggundu, Dr Catherine Maiteki-Sebuguzi, the members of the Programme for  
5 Resistance, Immunology, Surveillance and Modelling of Malaria in Uganda (PRISM) and the ACT PRIME  
6 and PROCESS research teams and also Ms Carolynne Stanley for logistical support at the London School  
7 of Hygiene and Tropical Medicine. Alice C. Eziefula is funded by a Clinical Fellowship from the Wellcome  
8 Trust of Great Britain (#090558/Z/09/Z).  
9  
10  
11  
12  
13  
14  
15  
16

### 17 **Competing interests**

18  
19  
20  
21 None declared  
22  
23  
24  
25  
26

### 27 **REFERENCES**

- 28  
29  
30  
31 1. Griffin JT, Hollingsworth TD, Okell LC, et al. Reducing Plasmodium falciparum malaria transmission in  
32 Africa: a model-based evaluation of intervention strategies. PLoS medicine 2010;**7**(8) doi:  
33 10.1371/journal.pmed.1000324[published Online First: Epub Date] | .  
34  
35  
36  
37 2. Dondorp AM, Nosten F, Yi P, et al. Artemisinin resistance in Plasmodium falciparum malaria. N Engl J  
38 Med 2009;**361**(5):455-67  
39  
40  
41 3. Amaratunga C, Sreng S, Suon S, et al. Artemisinin-resistant Plasmodium falciparum in Pursat province,  
42 western Cambodia: a parasite clearance rate study. Lancet Infect Dis 2012 doi: S1473-  
43 3099(12)70181-0 [pii]  
44  
45  
46  
47 10.1016/S1473-3099(12)70181-0[published Online First: Epub Date] | .  
48  
49  
50  
51 4. Stevenson J, St Laurent B, Lobo NF, et al. Novel vectors of malaria parasites in the Western highlands  
52 of Kenya. Emerg Infect Dis 2012;**18**(9):1547-9 doi: 10.3201/eid1809.120283[published Online  
53  
54  
55  
56  
57  
58  
59  
60

- 1  
2  
3  
4  
5  
6  
7  
8  
9  
10  
11  
12  
13  
14  
15  
16  
17  
18  
19  
20  
21  
22  
23  
24  
25  
26  
27  
28  
29  
30  
31  
32  
33  
34  
35  
36  
37  
38  
39  
40  
41  
42  
43  
44  
45  
46  
47  
48  
49  
50  
51  
52  
53  
54  
55  
56  
57  
58  
59  
60
5. Riehle MM, Guelbeogo WM, Gneme A, et al. A cryptic subgroup of *Anopheles gambiae* is highly susceptible to human malaria parasites. *Science* 2011;**331**(6017):596-8 doi: 331/6017/596 [pii] 10.1126/science.1196759[published Online First: Epub Date]].
  6. Trung HD, Bortel WV, Sochantha T, et al. Behavioural heterogeneity of *Anopheles* species in ecologically different localities in Southeast Asia: a challenge for vector control. *Trop Med Int Health* 2005;**10**(3):251-62 doi: TMI1378 [pii] 10.1111/j.1365-3156.2004.01378.x[published Online First: Epub Date]].
  7. Dondorp AM. Editorial commentary: single-dose primaquine as gametocytocidal treatment in patients with uncomplicated falciparum malaria. *Clinical infectious diseases : an official publication of the Infectious Diseases Society of America* 2013;**56**(5):694-6 doi: 10.1093/cid/cis962[published Online First: Epub Date]].
  8. Alonso PL, Brown G, Arevalo-Herrera M, et al. A research agenda to underpin malaria eradication. *PLoS medicine* 2011;**8**(1):e1000406 doi: 10.1371/journal.pmed.1000406[published Online First: Epub Date]].
  9. Field JW, Shute P. The Microscopic Diagnosis of Human Malaria. II. A Morphological Study of the Erythrocytic Parasites. *Studies from the Institute for Medical Research, Federated Malay States* 1956(24)
  10. Smalley ME, Abdalla S, Brown J. The distribution of *Plasmodium falciparum* in the peripheral blood and bone marrow of Gambian children. *Transactions of the Royal Society of Tropical Medicine and Hygiene* 1981;**75**(1):103-5
  11. Rogers NJ, Hall BS, Obiero J, et al. A model for sequestration of the transmission stages of *Plasmodium falciparum*: adhesion of gametocyte-infected erythrocytes to human bone marrow cells. *Infection and immunity* 2000;**68**(6):3455-62

- 1  
2  
3  
4  
5  
6  
7  
8  
9  
10  
11  
12  
13  
14  
15  
16  
17  
18  
19  
20  
21  
22  
23  
24  
25  
26  
27  
28  
29  
30  
31  
32  
33  
34  
35  
36  
37  
38  
39  
40  
41  
42  
43  
44  
45  
46  
47  
48  
49  
50  
51  
52  
53  
54  
55  
56  
57  
58  
59  
60
12. Thomson JG RA. The structure and development of Plasmodium falciparum gametocytes in the internal organs and peripheral circulation. Transactions of the Royal Society of Tropical Medicine and Hygiene 1935;**29**(1):31-34
  13. Smalley ME, Sinden RE. Plasmodium falciparum gametocytes: their longevity and infectivity. Parasitology 1977;**74**(1):1-8
  14. Lensen A, Bril A, van de Vegte M, et al. Plasmodium falciparum: infectivity of cultured, synchronized gametocytes to mosquitoes. Experimental parasitology 1999;**91**(1):101-3 doi: 10.1006/expr.1998.4354[published Online First: Epub Date]|.
  15. Adjalley SH, Johnston GL, Li T, et al. Quantitative assessment of Plasmodium falciparum sexual development reveals potent transmission-blocking activity by methylene blue. Proceedings of the National Academy of Sciences of the United States of America 2011;**108**(47):E1214-23 doi: 10.1073/pnas.1112037108[published Online First: Epub Date]|.
  16. Bousema T, Drakeley C. Epidemiology and infectivity of Plasmodium falciparum and Plasmodium vivax gametocytes in relation to malaria control and elimination. Clinical microbiology reviews 2011;**24**(2):377-410 doi: 10.1128/CMR.00051-10[published Online First: Epub Date]|.
  17. Bousema JT, Schneider P, Gouagna LC, et al. Moderate effect of artemisinin-based combination therapy on transmission of Plasmodium falciparum. The Journal of infectious diseases 2006;**193**(8):1151-9 doi: 10.1086/503051[published Online First: Epub Date]|.
  18. Ali E, Mackinnon MJ, Abdel-Muhsin AM, et al. Increased density but not prevalence of gametocytes following drug treatment of Plasmodium falciparum. Transactions of the Royal Society of Tropical Medicine and Hygiene 2006;**100**(2):176-83 doi: 10.1016/j.trstmh.2005.04.021[published Online First: Epub Date]|.

- 1  
2  
3  
4  
5  
6  
7  
8  
9  
10  
11  
12  
13  
14  
15  
16  
17  
18  
19  
20  
21  
22  
23  
24  
25  
26  
27  
28  
29  
30  
31  
32  
33  
34  
35  
36  
37  
38  
39  
40  
41  
42  
43  
44  
45  
46  
47  
48  
49  
50  
51  
52  
53  
54  
55  
56  
57  
58  
59  
60
19. Targett G, Drakeley C, Jawara M, et al. Artesunate reduces but does not prevent posttreatment transmission of *Plasmodium falciparum* to *Anopheles gambiae*. *The Journal of infectious diseases* 2001;**183**(8):1254-9 doi: 10.1086/319689[published Online First: Epub Date]].
20. Drakeley CJ, Jawara M, Targett GA, et al. Addition of artesunate to chloroquine for treatment of *Plasmodium falciparum* malaria in Gambian children causes a significant but short-lived reduction in infectiousness for mosquitoes. *Tropical medicine & international health : TM & IH* 2004;**9**(1):53-61
21. Schneider P, Bousema T, Omar S, et al. (Sub)microscopic *Plasmodium falciparum* gametocytaemia in Kenyan children after treatment with sulphadoxine-pyrimethamine monotherapy or in combination with artesunate. *International journal for parasitology* 2006;**36**(4):403-8 doi: 10.1016/j.ijpara.2006.01.002[published Online First: Epub Date]].
22. Mens PF, Sawa P, van Amsterdam SM, et al. A randomized trial to monitor the efficacy and effectiveness by QT-NASBA of artemether-lumefantrine versus dihydroartemisinin-piperaquine for treatment and transmission control of uncomplicated *Plasmodium falciparum* malaria in western Kenya. *Malaria journal* 2008;**7**:237 doi: 10.1186/1475-2875-7-237[published Online First: Epub Date]].
23. Ouedraogo AL, Bousema T, Schneider P, et al. Substantial contribution of submicroscopical *Plasmodium falciparum* gametocyte carriage to the infectious reservoir in an area of seasonal transmission. *PloS one* 2009;**4**(12):e8410 doi: 10.1371/journal.pone.0008410[published Online First: Epub Date]].
24. Tekwani BL, Walker LA. 8-Aminoquinolines: future role as antiprotozoal drugs. *Current opinion in infectious diseases* 2006;**19**(6):623-31 doi: 10.1097/QCO.0b013e328010b848[published Online First: Epub Date]].

- 1  
2  
3 25. Shekalaghe S, Drakeley C, Gosling R, et al. Primaquine clears submicroscopic Plasmodium falciparum  
4 gametocytes that persist after treatment with sulphadoxine-pyrimethamine and artesunate.  
5  
6 PloS one 2007;**2**(10):e1023 doi: 10.1371/journal.pone.0001023[published Online First: Epub  
7  
8 Date]].  
9  
10  
11  
12 26. Sutanto I, Suprijanto S, Kosasih A, et al. The Effect of Primaquine on Gametocyte Development and  
13 Clearance in the Treatment of Uncomplicated Falciparum Malaria With Dihydroartemisinin-  
14  
15 Piperaquine in South Sumatra, Western Indonesia: An Open-Label, Randomized, Controlled  
16  
17 Trial. Clinical infectious diseases : an official publication of the Infectious Diseases Society of  
18  
19 America 2012 doi: 10.1093/cid/cis959[published Online First: Epub Date]].  
20  
21  
22  
23  
24 27. Smithuis F, Kyaw MK, Phe O, et al. Effectiveness of five artemisinin combination regimens with or  
25  
26 without primaquine in uncomplicated falciparum malaria: an open-label randomised trial. The  
27  
28 Lancet infectious diseases 2010;**10**(10):673-81 doi: 10.1016/S1473-3099(10)70187-0[published  
29  
30 Online First: Epub Date]].  
31  
32  
33 28. Pukrittayakamee S, Chotivanich K, Chantra A, et al. Activities of artesunate and primaquine against  
34  
35 asexual- and sexual-stage parasites in falciparum malaria. Antimicrob Agents Chemother  
36  
37 2004;**48** (4):1329-34  
38  
39  
40 29. Alving AS, Johnson CF, Tarlov AR, et al. Mitigation of the haemolytic effect of primaquine and  
41  
42 enhancement of its action against exoerythrocytic forms of the Chesson strain of Plasmodium  
43  
44 vivax by intermittent regimens of drug administration: a preliminary report. Bull World Health  
45  
46 Organ 1960;**22**:621-31  
47  
48  
49 30. Burgess RW, Bray RS. The effect of a single dose of primaquine on the gametocytes, gametogony and  
50  
51 sporogony of Laverania falciparum. Bulletin of the World Health Organization 1961;**24**:451-6  
52  
53  
54 31. White NJ, Qiao LG, Qi G, et al. Rationale for recommending a lower dose of primaquine as a  
55  
56 Plasmodium falciparum gametocytocide in populations where G6PD deficiency is common.  
57  
58  
59  
60



- 1  
2  
3 Malaria journal 2012;**11**:418 doi: 10.1186/1475-2875-11-418[published Online First: Epub  
4 Date]].  
5  
6  
7
- 8 32. Charles LJ. Observations on the haemolytic effect of primaquine in 100 Ghanaian children. *Annals of*  
9  
10 *tropical medicine and parasitology* 1960;**54**:460-70  
11
- 12 33. Reeve PA, Toaliu H, Kaneko A, et al. Acute intravascular haemolysis in Vanuatu following a single  
13  
14 dose of primaquine in individuals with glucose-6-phosphate dehydrogenase deficiency. *J Trop*  
15  
16 *Med Hyg* 1992;**95**(5):349-51  
17
- 18 34. Shekalaghe SA, ter Braak R, Daou M, et al. In Tanzania, hemolysis after a single dose of primaquine  
19  
20 coadministered with an artemisinin is not restricted to glucose-6-phosphate dehydrogenase-  
21  
22 deficient (G6PD A-) individuals. *Antimicrobial agents and chemotherapy* 2010;**54**(5):1762-8 doi:  
23  
24 10.1128/AAC.01135-09[published Online First: Epub Date]].  
25  
26  
27
- 28 35. Song J, Socheat D, Tan B, et al. Rapid and effective malaria control in Cambodia through mass  
29  
30 administration of artemisinin-piperaquine. *Malar J* 2010;**9**:57 doi: 1475-2875-9-57 [pii]  
31  
32 10.1186/1475-2875-9-57[published Online First: Epub Date]].  
33  
34  
35
- 36 36. El-Sayed B, El-Zaki SE, Babiker H, et al. A randomized open-label trial of artesunate- sulfadoxine-  
37  
38 pyrimethamine with or without primaquine for elimination of sub-microscopic *P. falciparum*  
39  
40 parasitaemia and gametocyte carriage in eastern Sudan. *PloS one* 2007;**2**(12):e1311 doi:  
41  
42 10.1371/journal.pone.0001311[published Online First: Epub Date]].  
43  
44  
45
- 46 37. Okello PE, Van Bortel W, Byaruhanga AM, et al. Variation in malaria transmission intensity in seven  
47  
48 sites throughout Uganda. *The American journal of tropical medicine and hygiene*  
49  
50 2006;**75**(2):219-25  
51
- 52 38. Beutler E, Mitchell M. Special modifications of the fluorescent screening method for glucose-6-  
53  
54 phosphate dehydrogenase deficiency. *Blood* 1968;**32**(5):816-8  
55  
56  
57  
58  
59  
60

- 1  
2  
3 39. Beutler E, Duparc S, Group GPDW. Glucose-6-phosphate dehydrogenase deficiency and antimalarial  
4 drug development. *The American journal of tropical medicine and hygiene* 2007;**77**(4):779-89  
5  
6  
7  
8 40. Schneider P, Schoone G, Schallig H, et al. Quantification of *Plasmodium falciparum* gametocytes in  
9 differential stages of development by quantitative nucleic acid sequence-based amplification.  
10  
11 *Molecular and biochemical parasitology* 2004;**137**(1):35-41 doi:  
12 10.1016/j.molbiopara.2004.03.018[published Online First: Epub Date]].  
13  
14  
15  
16  
17 41. Bousema T, Okell L, Shekalaghe S, et al. Revisiting the circulation time of *Plasmodium falciparum*  
18 gametocytes: molecular detection methods to estimate the duration of gametocyte carriage and  
19 the effect of gametocytocidal drugs. *Malaria journal* 2010;**9**:136 doi: 10.1186/1475-2875-9-  
20 136[published Online First: Epub Date]].  
21  
22  
23  
24  
25  
26 42. Okell LC, Drakeley CJ, Bousema T, et al. Modelling the impact of artemisinin combination therapy  
27 and long-acting treatments on malaria transmission intensity. *PLoS Med* 2008;**5**(11):e226;  
28 discussion e26  
29  
30  
31  
32  
33 43. Mendez F, Munoz A, Plowe CV. Use of area under the curve to characterize transmission potential  
34 after antimalarial treatment. *The American journal of tropical medicine and hygiene*  
35 2006;**75**(4):640-4  
36  
37  
38  
39  
40 44. von Seidlein L. Mini Primaquine? Controversy and Uncertainty Surround WHO Guidelines for the  
41 Antimalarial Primaquine. *PLoS Blogs* 2012  
42  
43  
44  
45 45. Laufer MK. Monitoring antimalarial drug efficacy: current challenges. *Current infectious disease*  
46 reports 2009;**11**(1):59-65  
47  
48  
49 46. Organization WH. Methods and techniques for clinical trials on antimalarial drug efficacy: genotyping  
50 to identify parasite populations. Geneva: World Health Organization 2007  
51  
52  
53  
54  
55  
56  
57  
58  
59  
60

- 1  
2  
3  
4 47. Chomcharn Y, Surathin K, Bunnag D, et al. Effect of a single dose of primaquine on a Thai strain of  
5  
6 Plasmodium falciparum. The Southeast Asian journal of tropical medicine and public health  
7  
8 1980;**11**(3):408-12  
9
- 10 48. Kaneko A, Kamei K, Suzuki T, et al. Gametocytocidal effect of primaquine in a chemotherapeutic  
11  
12 malaria control trial in North Sumatra, Indonesia. The Southeast Asian journal of tropical  
13  
14 medicine and public health 1989;**20**(3):351-9  
15  
16
- 17 49. Pukrittayakamee S, Chotivanich K, Chantra A, et al. Activities of artesunate and primaquine against  
18  
19 asexual- and sexual-stage parasites in falciparum malaria. Antimicrobial agents and  
20  
21 chemotherapy 2004;**48**(4):1329-34  
22  
23
- 24 50. Boudin C, Olivier M, Molez JF, et al. High human malarial infectivity to laboratory-bred Anopheles  
25  
26 gambiae in a village in Burkina Faso. The American journal of tropical medicine and hygiene  
27  
28 1993;**48**(5):700-6  
29  
30
- 31 51. Talman AM, Domarle O, McKenzie FE, et al. Gametocytogenesis: the puberty of Plasmodium  
32  
33 falciparum. Malaria journal 2004;**3**:24 doi: 10.1186/1475-2875-3-24[published Online First: Epub  
34  
35 Date]].  
36  
37
- 38 52. Kilian AH, Metzger WG, Mutschelknauss EJ, et al. Reliability of malaria microscopy in epidemiological  
39  
40 studies: results of quality control. Tropical medicine & international health : TM & IH  
41  
42 2000;**5**(1):3-8  
43  
44
- 45 53. Hallett RL, Dunyo S, Ord R, et al. Chloroquine/sulphadoxine-pyrimethamine for gambian children  
46  
47 with malaria: transmission to mosquitoes of multidrug-resistant Plasmodium falciparum. PLoS  
48  
49 clinical trials 2006;**1**(3):e15 doi: 10.1371/journal.pctr.0010015[published Online First: Epub  
50  
51 Date]].  
52  
53
- 54 54. Fofana B DA, Sagara I, Dao A, et al. Impact of artemisinin-based combination therapy on malaria  
55  
56 transmission in Mali. 5th MIM Pan-African Malaria Conference. Nairobi, Kenya, 2009.  
57  
58  
59  
60

- 1  
2  
3 55. Gunders AE. The effect of a single dose of pyrimethamine and primaquine in combination upon  
4 gametocytes and sporogony of *Laverania falcipara* (*Plasmodium falciparum*) in Liberia. Bulletin  
5 of the World Health Organization 1961;**24**:650-3  
6  
7  
8  
9  
10 56. Jeffery GM, Young MD, Eyles DE. The treatment of *Plasmodium falciparum* infection with  
11 chloroquine, with a note on infectivity to mosquitoes of primaquine- and pyrimethamine-  
12 treated cases. American journal of hygiene 1956;**64**(1):1-11  
13  
14  
15  
16  
17 57. Bousema T, Churcher TS, Morlais I, et al. Can field-based mosquito feeding assays be used for  
18 evaluating transmission-blocking interventions? Trends in parasitology 2013;**29**(2):53-9 doi:  
19 10.1016/j.pt.2012.11.004[published Online First: Epub Date]].  
20  
21  
22  
23  
24 58. Mackerras MJ, Ercole QN. Observations on the action of quinine, atebirin and plasmquine on the  
25 gametocytes of *Plasmodium falciparum*. Transactions of the Royal Society of Tropical Medicine  
26 and Hygiene 1949;**42**(5):455-63  
27  
28  
29  
30  
31 59. Rieckmann KH, McNamara JV, Frischer H, et al. Gametocytocidal and sporontocidal effects of  
32 primaquine and of sulfadiazine with pyrimethamine in a chloroquine-resistant strain of  
33 *Plasmodium falciparum*. Bulletin of the World Health Organization 1968;**38**(4):625-32  
34  
35  
36  
37  
38 60. Bousema T, Dinglasan RR, Morlais I, et al. Mosquito feeding assays to determine the infectiousness  
39 of naturally infected *Plasmodium falciparum* gametocyte carriers. PloS one 2012;**7**(8):e42821  
40 doi: 10.1371/journal.pone.0042821[published Online First: Epub Date]].  
41  
42  
43  
44  
45 61. Eziefula AC, Gosling R, Hwang J, et al. Rationale for short course primaquine in Africa to interrupt  
46 malaria transmission. Malaria journal 2012;**11**:360 doi: 10.1186/1475-2875-11-360[published  
47 Online First: Epub Date]].  
48  
49  
50  
51  
52 62. Graves PM, Gelband H, Garner P. Primaquine for reducing *Plasmodium falciparum* transmission.  
53 Cochrane database of systematic reviews 2012;**9**:CD008152 doi:  
54 10.1002/14651858.CD008152.pub2[published Online First: Epub Date]].  
55  
56  
57  
58  
59  
60

- 1  
2  
3  
4  
5  
6  
7  
8  
9  
10  
11  
12  
13  
14  
15  
16  
17  
18  
19  
20  
21  
22  
23  
24  
25  
26  
27  
28  
29  
30  
31  
32  
33  
34  
35  
36  
37  
38  
39  
40  
41  
42  
43  
44  
45  
46  
47  
48  
49  
50  
51  
52  
53  
54  
55  
56  
57  
58  
59  
60
63. Dondorp AM, Fairhurst RM, Slutsker L, et al. The threat of artemisinin-resistant malaria. The New England journal of medicine 2011;**365**(12):1073-5 doi: 10.1056/NEJMp1108322[published Online First: Epub Date] | .
64. Okell LC, Bousema T, Griffin JT, et al. Factors determining the occurrence of submicroscopic malaria infections and their relevance for control. Nature communications 2012;**3**:1237 doi: 10.1038/ncomms2241[published Online First: Epub Date] | .
65. Okell LC, Griffin JT, Kleinschmidt I, et al. The potential contribution of mass treatment to the control of Plasmodium falciparum malaria. PloS one 2011;**6**(5):e20179 doi: 10.1371/journal.pone.0020179[published Online First: Epub Date] | .

## FIGURE LEGENDS

**Figure 1: Enrolment and selection procedures**

**Figure 2: Participant flow diagram**

**Figure 3: Procedure for investigation of suspected haemolysis**

**Figure 4: Procedure for management of haemolysis**

1  
2  
3  
4  
5  
6  
7  
8  
9  
10  
11  
12  
13  
14  
15  
16  
17  
18  
19  
20  
21  
22  
23  
24  
25  
26  
27  
28  
29  
30  
31  
32  
33  
34  
35  
36  
37  
38  
39  
40  
41  
42  
43  
44  
45  
46  
47  
48  
49  
50  
51  
52  
53  
54  
55  
56  
57  
58  
59  
60

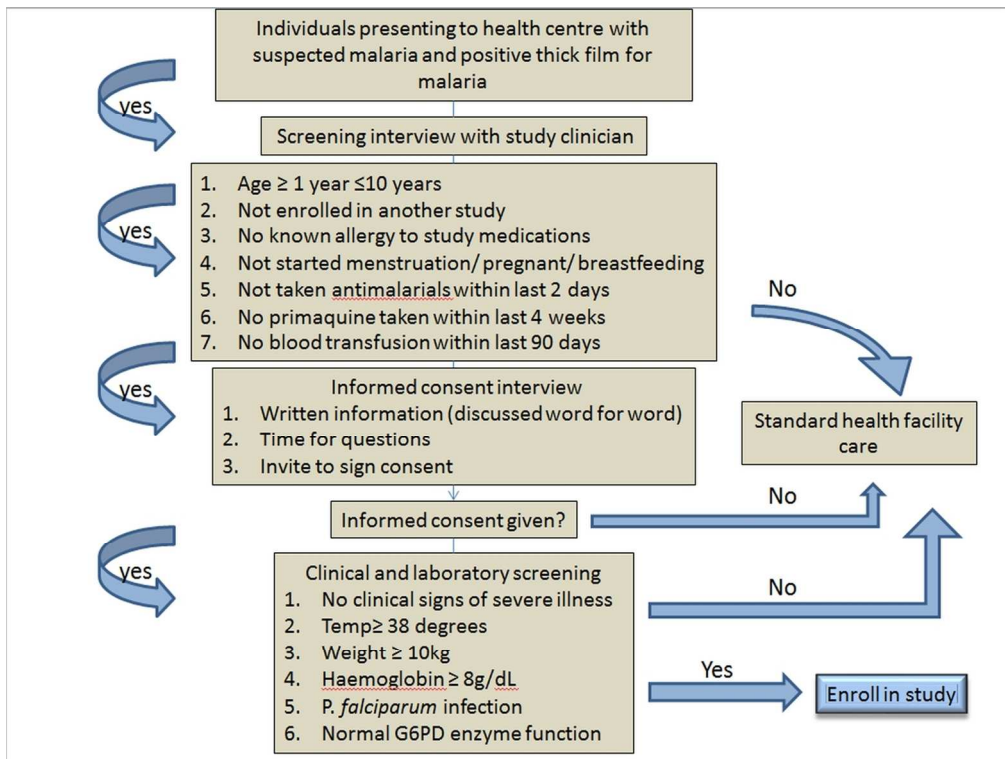

Enrolment and selection procedures  
119x90mm (300 x 300 DPI)

Review only

1  
2  
3  
4  
5  
6  
7  
8  
9  
10  
11  
12  
13  
14  
15  
16  
17  
18  
19  
20  
21  
22  
23  
24  
25  
26  
27  
28  
29  
30  
31  
32  
33  
34  
35  
36  
37  
38  
39  
40  
41  
42  
43  
44  
45  
46  
47  
48  
49  
50  
51  
52  
53  
54  
55  
56  
57  
58  
59  
60

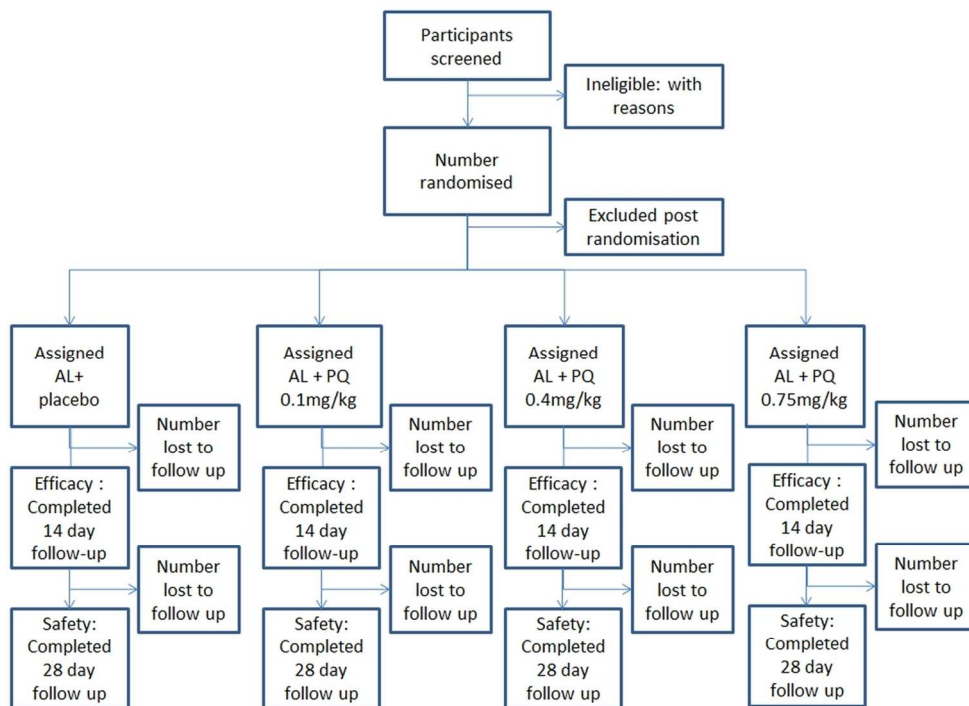

Participant flow diagram  
119x90mm (300 x 300 DPI)

ew only

1  
2  
3  
4  
5  
6  
7  
8  
9  
10  
11  
12  
13  
14  
15  
16  
17  
18  
19  
20  
21  
22  
23  
24  
25  
26  
27  
28  
29  
30  
31  
32  
33  
34  
35  
36  
37  
38  
39  
40  
41  
42  
43  
44  
45  
46  
47  
48  
49  
50  
51  
52  
53  
54  
55  
56  
57  
58  
59  
60

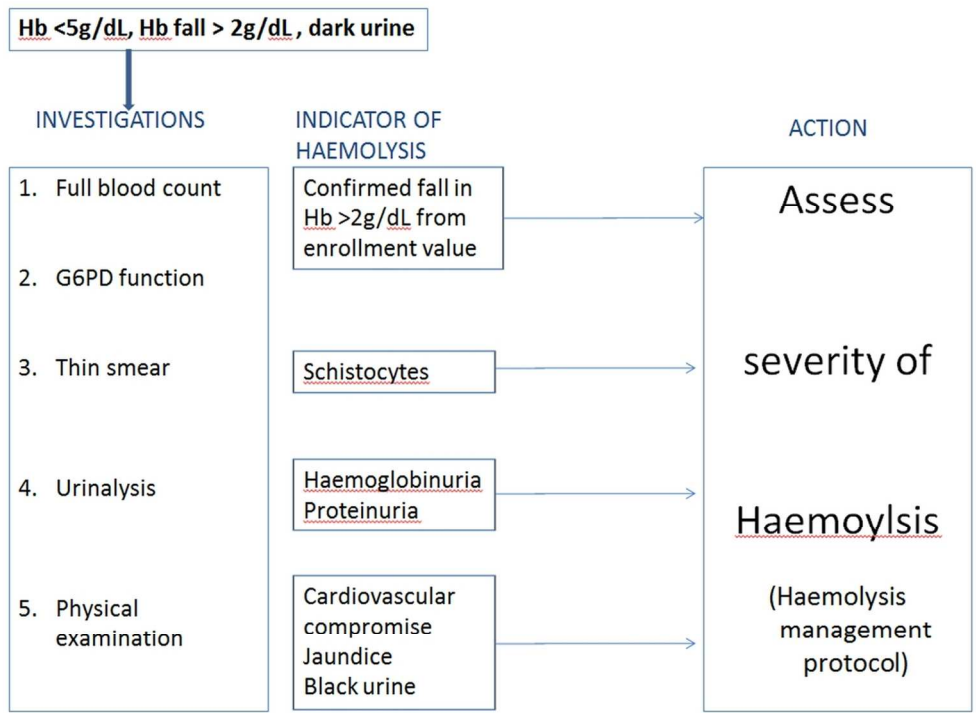

Procedure for investigation of suspected haemolysis  
120x90mm (300 x 300 DPI)

Review only



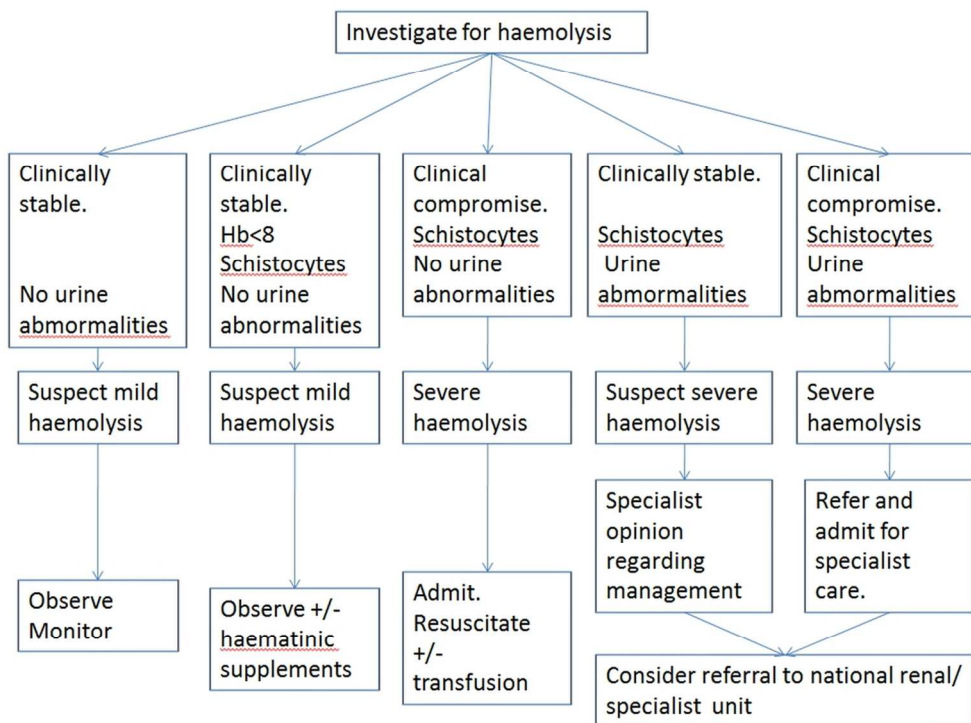

Procedure for management of haemolysis  
119x90mm (300 x 300 DPI)

Review only
